# Supplementary material for: Is academic medicine prepared to teach about the intersection of childhood experiences and health across the life course? An exploratory survey of faculty
Source: bioRxiv or medRxiv preprint supplement (doi:10.1101/2021.09.02.21263054), 2021-09-10
Supplement: Supplementary file [file media-1.pdf]

**Appendix Table A.** Responses to Knowledge and Beliefs Questions Among 81 Medical Faculty Surveyed in 2020 in Chicago, IL

| Statement                                                                                                                                                             | K or B | 1<br>Strongly<br>Disagree<br>n <sup>a</sup> (%) | 2<br>Disagree<br>n <sup>a</sup> (%) | 3<br>Neither<br>Agree nor<br>Disagree<br>n <sup>a</sup> (%) | 4<br>Agree<br>n <sup>a</sup> (%) | 5<br>Strongly<br>Agree<br>n <sup>a</sup> (%) | Mean<br>(SD)   | “Correct”/<br>“Favorable”<br>Response Rate<br>(%) |
|-----------------------------------------------------------------------------------------------------------------------------------------------------------------------|--------|-------------------------------------------------|-------------------------------------|-------------------------------------------------------------|----------------------------------|----------------------------------------------|----------------|---------------------------------------------------|
| 1. Childhood experiences have a significant impact on physical health.                                                                                                | K      | 0/81<br>(0.0)                                   | 0/81<br>(0.0)                       | 4/81<br>(4.9)                                               | 27/81<br>(33.3)                  | 50/81<br>(61.7)                              | 4.57<br>(0.59) | <b>95.1</b>                                       |
| 2. Events that occurred in childhood do not have an effect on health in adulthood.                                                                                    | K      | 59/81<br>(72.8)                                 | 17/81<br>(21.0)                     | 2/81<br>(2.5)                                               | 1/81<br>(1.2)                    | 2/81<br>(2.5)                                | 1.40<br>(0.82) | <b>93.8</b>                                       |
| 3. Childhood adversity is preventable.                                                                                                                                | K      | 1/81<br>(1.2)                                   | 14/81<br>(17.3)                     | 27/81<br>(33.3)                                             | 36/81<br>(44.4)                  | 3/81<br>(3.7)                                | 3.32<br>(0.85) | <b>48.2</b>                                       |
| 4. The consequences of childhood adversity can be mitigated and treated.                                                                                              | K      | 0/81<br>(0.0)                                   | 1/81<br>(1.2)                       | 9/81 (11.1)                                                 | 60/81<br>(74.1)                  | 11/81<br>(13.6)                              | 4.00<br>(0.55) | <b>87.7</b>                                       |
| 5. I believe that people are fully responsible for their health or illness. Childhood adversity is an excuse for bad behavior.                                        | B      | 48/81<br>(59.3)                                 | 27/81<br>(33.3)                     | 5/81<br>(6.2)                                               | 1/81 (1.2)                       | 0/81<br>(0.0)                                | 1.49<br>(0.67) | <b>92.6</b>                                       |
| 6. Knowing about the impact of childhood adversity on health is relevant to patient care in my specialty.                                                             | B      | 1/81<br>(1.2)                                   | 0/81<br>(0.0)                       | 8/81<br>(9.9)                                               | 23/81<br>(28.4)                  | 49/81<br>(60.5)                              | 4.47<br>(0.78) | <b>88.9</b>                                       |
| 7. Patients who present with unexplained symptoms, severe or rare presentations, and/or multiple chronic health problems often have a history of childhood adversity. | K      | 1/81<br>(1.2)                                   | 1/81<br>(1.2)                       | 36/81<br>(44.4)                                             | 31/81<br>(38.3)                  | 12/81<br>(14.8)                              | 3.64<br>(0.80) | <b>53.1</b>                                       |

|                                                                                                                                                    |   |                 |                 |                 |                 |                 |                |             |
|----------------------------------------------------------------------------------------------------------------------------------------------------|---|-----------------|-----------------|-----------------|-----------------|-----------------|----------------|-------------|
| 8. Providing opportunities for my patients to discuss their history of childhood adversity can be more upsetting than helpful for them.            | B | 16/81<br>(19.8) | 40/81<br>(49.4) | 23/81<br>(28.4) | 2/81<br>(2.5)   | 0/81<br>(0.0)   | 2.14<br>(0.75) | <b>69.1</b> |
| 9. I don't have time to ask patients about their childhood history.                                                                                | B | 12/81<br>(14.8) | 20/81<br>(24.7) | 16/81<br>(19.8) | 30/81<br>(37.0) | 3/81<br>(3.7)   | 2.90<br>(1.17) | <b>39.5</b> |
| 10. I feel uncomfortable asking patients about their childhood history.                                                                            | B | 18/81<br>(22.2) | 38/81<br>(46.9) | 14/81<br>(17.3) | 10/81<br>(12.3) | 1/81<br>(1.2)   | 2.23<br>(0.98) | <b>69.1</b> |
| 11. Patients should primarily discuss experiences of childhood adversity and trauma with a mental health provider.                                 | B | 9/79<br>(11.4)  | 35/79<br>(44.3) | 19/79<br>(24.1) | 15/79<br>(19.0) | 1/79<br>(1.3)   | 2.54<br>(0.97) | <b>55.7</b> |
| 12. Patients should have the opportunity to discuss experiences of childhood adversity and trauma with their medical doctor.                       | B | 0/80<br>(0.0)   | 1/80<br>(1.2)   | 1/80<br>(1.2)   | 38/80<br>(47.5) | 40/80<br>(50.0) | 4.46<br>(0.59) | <b>97.5</b> |
| 13. Childhood adversity is extremely common and affects patients and health-care practitioners of all racial and socioeconomic backgrounds.        | K | 0/80<br>(0.0)   | 0/80<br>(0.0)   | 7/80<br>(8.8)   | 30/80<br>(37.5) | 43/80<br>(53.8) | 4.45<br>(0.65) | <b>91.3</b> |
| 14. It is my responsibility as a clinician to create a safe environment where patients feel comfortable disclosing their childhood history.        | B | 0/80<br>(0.0)   | 0/80<br>(0.0)   | 1/80<br>(1.2)   | 24/80<br>(30.0) | 55/80<br>(68.8) | 4.67<br>(0.50) | <b>98.8</b> |
| 15. Patients will disclose their childhood history if and when they are ready and at their own pace if I create a safe and respectful environment. | B | 0/80<br>(0.0)   | 1/80<br>(1.2)   | 17/80<br>(21.2) | 36/80<br>(45.0) | 26/80<br>(32.5) | 4.09<br>(0.77) | <b>77.5</b> |

|                                                                                                                                                   |   |                |                 |                 |                 |                 |                |             |
|---------------------------------------------------------------------------------------------------------------------------------------------------|---|----------------|-----------------|-----------------|-----------------|-----------------|----------------|-------------|
| 16. It is my responsibility as a clinician to offer prevention, mitigation, and treatment strategies for the consequences of childhood adversity. | B | 1/79<br>(1.3)  | 3/79<br>(3.8)   | 13/79<br>(16.5) | 34/79<br>(43.0) | 28/79<br>(35.4) | 4.08<br>(0.89) | <b>78.5</b> |
| 17. I have direct access to resources that can help my patients prevent and/or address the consequences of childhood adversity.                   | B | 9/80<br>(11.2) | 25/80<br>(31.2) | 21/80<br>(26.2) | 17/80<br>(21.2) | 8/80<br>(10.0)  | 2.88<br>(1.17) | <b>31.3</b> |

Abbreviations: K = Knowledge; B = Belief; SD = Standard Deviation

<sup>a</sup>Number of respondents

**Appendix Table B.** Responses to Exposure Questions Among 81 Medical Faculty Surveyed in 2020 in Chicago, IL

| Statement                                                                                                                                                                                | Exposure Score <sup>a</sup> (%) |                 | n <sup>b</sup> /N <sup>c</sup> (%) |                        | n <sup>b</sup> /N <sup>c</sup> (%) |
|------------------------------------------------------------------------------------------------------------------------------------------------------------------------------------------|---------------------------------|-----------------|------------------------------------|------------------------|------------------------------------|
| 18. Individual, family, community, structural and historical childhood experiences, both positive and negative, are powerful influences of health across the lifespan.                   | <b>96.3</b>                     | Formal Training | 33/86 (38.4)                       | Informal training      | 35/86 (40.7)                       |
|                                                                                                                                                                                          |                                 | Undergrad       | 7                                  | Not sure where exposed | 15/86 (17.4)                       |
|                                                                                                                                                                                          |                                 | Med School      | 21                                 | No Exposure            | 3/86 (3.5)                         |
|                                                                                                                                                                                          |                                 | Residency       | 30                                 |                        |                                    |
|                                                                                                                                                                                          |                                 | Fellowship      | 9                                  |                        |                                    |
| 19. Experiences of abuse, neglect and household challenges are at the root of the majority of leading causes of death in the US as well as a myriad of other health and social problems. | <b>77.8</b>                     | Formal Training | 26/87 (29.9)                       | Informal training      | 26/87 (29.9)                       |
|                                                                                                                                                                                          |                                 | Undergrad       | 3                                  | Not sure where exposed | 17/87 (19.5)                       |
|                                                                                                                                                                                          |                                 | Med School      | 8                                  | No Exposure            | 18/87 (20.7)                       |
|                                                                                                                                                                                          |                                 | Residency       | 24                                 |                        |                                    |
|                                                                                                                                                                                          |                                 | Fellowship      | 8                                  |                        |                                    |
| 20. Healthcare professionals are more likely to have experienced childhood adversity themselves compared to the general population.                                                      | <b>13.6</b>                     | Formal Training | 3/78 (3.8)                         | Informal training      | 1/78 (1.3)                         |
|                                                                                                                                                                                          |                                 | Undergrad       | 1                                  | Not sure where exposed | 4/78 (5.1)                         |
|                                                                                                                                                                                          |                                 | Med School      | 1                                  | No Exposure            | 70/78 (89.7)                       |
|                                                                                                                                                                                          |                                 | Residency       | 3                                  |                        |                                    |
|                                                                                                                                                                                          |                                 | Fellowship      | 1                                  |                        |                                    |
| 21. Clinicians are at risk for additional trauma through exposure to patient suffering and punitive training and work situations.                                                        | <b>71.6</b>                     | Formal Training | 12/79 (15.2)                       | Informal training      | 17/79 (21.5)                       |
|                                                                                                                                                                                          |                                 | Undergrad       | 1                                  | Not sure where exposed | 27/79 (34.2)                       |
|                                                                                                                                                                                          |                                 | Med School      | 5                                  | No Exposure            | 23/79 (29.1)                       |
|                                                                                                                                                                                          |                                 | Residency       | 10                                 |                        |                                    |
|                                                                                                                                                                                          |                                 | Fellowship      | 3                                  |                        |                                    |

|                                                                                                                                                                                        |                    |                                                                                              |                                                             |                                                                           |                                                             |
|----------------------------------------------------------------------------------------------------------------------------------------------------------------------------------------|--------------------|----------------------------------------------------------------------------------------------|-------------------------------------------------------------|---------------------------------------------------------------------------|-------------------------------------------------------------|
| <p>22. Protective factors such as having basic needs met and caring relationships with adults can prevent and mitigate the consequences of childhood adversity.</p>                    | <p><b>90.1</b></p> | <p>Formal Training</p> <p>Undergrad</p> <p>Med School</p> <p>Residency</p> <p>Fellowship</p> | <p>23/84 (27.4)</p> <p>6</p> <p>15</p> <p>17</p> <p>6</p>   | <p>Informal training</p> <p>Not sure where exposed</p> <p>No Exposure</p> | <p>28/84 (33.3)</p> <p>25/84 (29.8)</p> <p>8/84 (9.5)</p>   |
| <p>23. Childhood experiences shape the growth, development, and structure of the brain.</p>                                                                                            | <p><b>96.3</b></p> | <p>Formal Training</p> <p>Undergrad</p> <p>Med School</p> <p>Residency</p> <p>Fellowship</p> | <p>39/84 (46.4)</p> <p>8</p> <p>24</p> <p>24</p> <p>8</p>   | <p>Informal training</p> <p>Not sure where exposed</p> <p>No Exposure</p> | <p>25/84 (29.8)</p> <p>17/84 (20.2)</p> <p>3/84 (3.6)</p>   |
| <p>24. Human brains have the capacity for neuroplasticity, or the brain's ability to change, across the lifespan, with the greatest capacity early in life.</p>                        | <p><b>96.3</b></p> | <p>Formal Training</p> <p>Undergrad</p> <p>Med School</p> <p>Residency</p> <p>Fellowship</p> | <p>56/83 (67.5)</p> <p>17</p> <p>45</p> <p>29</p> <p>14</p> | <p>Informal training</p> <p>Not sure where exposed</p> <p>No Exposure</p> | <p>15/83 (18.1)</p> <p>9/83 (10.8)</p> <p>3/83 (3.6)</p>    |
| <p>25. The timing, spacing, frequency and intensity of positive and negative childhood experiences determines the degree of their impact on health or illness across the lifespan.</p> | <p><b>69.1</b></p> | <p>Formal Training</p> <p>Undergrad</p> <p>Med School</p> <p>Residency</p> <p>Fellowship</p> | <p>17/80 (21.3)</p> <p>3</p> <p>7</p> <p>11</p> <p>4</p>    | <p>Informal training</p> <p>Not sure where exposed</p> <p>No Exposure</p> | <p>19/80 (23.8)</p> <p>19/80 (23.8)</p> <p>25/80 (31.3)</p> |
| <p>26. Childhood adversity, along with insufficient protective factors, is a toxic stressor and root cause of brain-body</p>                                                           | <p><b>69.1</b></p> | <p>Formal Training</p> <p>Undergrad</p>                                                      | <p>19/83 (22.9)</p> <p>2</p>                                | <p>Informal training</p> <p>Not sure where exposed</p>                    | <p>26/83 (31.3)</p> <p>13/83 (15.7)</p>                     |

|                                                                                                                                                                                                                                                                                                           |             |                 |              |                        |              |
|-----------------------------------------------------------------------------------------------------------------------------------------------------------------------------------------------------------------------------------------------------------------------------------------------------------|-------------|-----------------|--------------|------------------------|--------------|
| dysregulation, driving physiologic processes like chronic inflammation that cause disease.                                                                                                                                                                                                                |             | Med School      | 5            | No Exposure            | 25/83 (30.1) |
|                                                                                                                                                                                                                                                                                                           |             | Residency       | 15           |                        |              |
|                                                                                                                                                                                                                                                                                                           |             | Fellowship      | 4            |                        |              |
| 27. Rhythmic regulatory activities such as sleep, movement, quiet reflection, and creative expression build and support optimal development and function of brains and bodies.                                                                                                                            | <b>85.2</b> | Formal Training | 30/81 (37.0) | Informal training      | 19/81 (23.5) |
|                                                                                                                                                                                                                                                                                                           |             | Undergrad       | 3            | Not sure where exposed | 20/81 (24.7) |
|                                                                                                                                                                                                                                                                                                           |             | Med School      | 17           | No Exposure            | 12/81 (14.8) |
|                                                                                                                                                                                                                                                                                                           |             | Residency       | 24           |                        |              |
|                                                                                                                                                                                                                                                                                                           |             | Fellowship      | 9            |                        |              |
| 28. Evidence informed prevention and treatment strategies are based on principles of optimal mind-body development and include: equitable educational, job, and income opportunities for all families; perinatal home-visiting; parenting support and education; rhythmic regulatory activities and more. | <b>65.4</b> | Formal Training | 18/81 (22.2) | Informal training      | 19/81 (23.5) |
|                                                                                                                                                                                                                                                                                                           |             | Undergrad       | 3            | Not sure where exposed | 16/81 (19.8) |
|                                                                                                                                                                                                                                                                                                           |             | Med School      | 6            | No Exposure            | 28/81 (34.6) |
|                                                                                                                                                                                                                                                                                                           |             | Residency       | 13           |                        |              |
|                                                                                                                                                                                                                                                                                                           |             | Fellowship      | 3            |                        |              |

Abbreviations: US = United States; Undergrad = Undergraduate; Med School = Medical School

<sup>a</sup>Percent of Respondents with any exposure to concept:  $100 \times [(Total\ Respondents - Respondents\ Selecting\ "No\ Exposure")/81]$  where Total Respondents=81 Respondents who completed the survey.

<sup>b</sup>Number of responses per type of exposure

<sup>c</sup>Total number of responses
